# Supplementary material for: Ascorbic acid accumulates as a defense response to Turnip mosaic virus in resistant Brassica rapa cultivars
Source: PubMed Central journal article supplement (PMC5301938; doi:10.1093/jxb/erw223), 2016-06-02
Supplement: supp_erw223_supplementary_table_S1_Figures_S1_S11.pdf [file supp_erw223_supplementary_table_S1_Figures_S1_S11.pdf]

Table S1 *Brassica rapa* genes included in expression analysis

| Gene             | Encoded enzyme | <i>A. thaliana</i>                          |                        | <i>B. rapa</i> |                  | Forward primer (5' to 3')                     | Reverse primer (5' to 3')                      | References                                                     |
|------------------|----------------|---------------------------------------------|------------------------|----------------|------------------|-----------------------------------------------|------------------------------------------------|----------------------------------------------------------------|
|                  |                | Gene ID                                     | GenBank acc. no.       | Gene ID        | GenBank acc. no. |                                               |                                                |                                                                |
| Internal control | PP2A           | ---                                         | ---                    | EX054539       | Bra025162        | AGGTGACACTATAGAATAATTTGATGCAATATTCTGAACCTCTCA | GTACGACTCACTATAGGGAACCACTTAGGCTGTTTGCATGA      | Chen et al. (2010) Anal Biochem 405:138–140                    |
|                  | TIP41          | ---                                         | ---                    | EX117271       | Bra011516        | AGGTGACACTATAGAATAACCTGAGGGGGAAGCTAGTC        | GTACGACTCACTATAGGGACTCCATTGTACGCCAGTTCA        | Chen et al. (2010) Anal Biochem 405:138–140                    |
|                  | Actin          | ---                                         | ---                    | EX139908       | Bra037560        | AGGTGACACTATAGAATAACATTCCAGCAGATGTGGATCTC     | GTACGACTCACTATAGGGAACCCAGAGAGTTTTGTCCACAC      | Schuller and Ludwig-Müller (2006) New Phytologist 171: 145–157 |
| AsA synthesis    | MIOX           | Myoinositol oxygenase                       | At4g26260              | EX132809       | Bra041014        | AGGTGACACTATAGAATAGCTGGCTATGAAGTAATTAGTCTCG   | GTACGACTCACTATAGGGAACCTCGTATGGATGATTGTGA       |                                                                |
|                  | PMI            | Phosphomannose isomerase                    | At1g42550              | ES934679       | Bra021430        | AGGTGACACTATAGAATAGGGAACCTCGCAATTGAGTC        | GTACGACTCACTATAGGGACACTGGAGCCATCAGCAT          |                                                                |
|                  | GMP            | GDP-D-mannose pyrophosphorylase             | At2g39770              | EX141191       | Bra005014        | AGGTGACACTATAGAATAATTTTCATCTTTGTGCTTTCCGG     | GTACGACTCACTATAGGGATTACAAAACCAAAATGACTTTTAAC   |                                                                |
|                  | GGP            | GDP-L-galactose phosphorylase               | At4g26850              | EX092676       | Bra010424        | AGGTGACACTATAGAATAATTTCTCCGGGAAAATTTGG        | GTACGACTCACTATAGGGATGCGGCAAAAGGTTAGTCT         |                                                                |
|                  | GPP            | L-galactose-1-phosphate phosphatase         | At3g02870              | EX061908       | Bra040607        | AGGTGACACTATAGAATAAAGCTGGACAGGTGATTCGT        | GTACGACTCACTATAGGGAACCATTCAGCTGTTGTTT          |                                                                |
|                  | GaldH          | L-galactose dehydrogenase                   | At4g33670              | EX133611       | Bra036989        | AGGTGACACTATAGAATATGGGAAACACAGGTCTCAAA        | GTACGACTCACTATAGGGATTAATGCCTTGTCCGAAACG        |                                                                |
|                  | GLDH           | L-galactono-1,4-lactone dehydrogenase       | At3g47930              | ES933110       | Bra018100        | AGGTGACACTATAGAATAATACGACAGCACTGGCTCTCT       | GTACGACTCACTATAGGGAGTCTCCGGTGGTTAAAGTTT        |                                                                |
|                  | GalUR          | D-galacturonate reductase                   | ---                    | EX083199       | Bra027828        | AGGTGACACTATAGAATATGAAGTGGAGGAATGCAAGA        | GTACGACTCACTATAGGGAGCAGTCAAAAACAATGCCCTT       | Agius et al. (2003) Nat Biotechnol 21:177-181                  |
|                  | AsA oxidation  | APX3                                        | Ascorbate peroxidase 3 | At4g35000      | EX121179         | Bra013053                                     | AGGTGACACTATAGAATAACAAGCTTACAGTCACTATGGC       | GTACGACTCACTATAGGGAGAGAAGAGAGGGGAATGCGT                        |
| APX4             |                | Ascorbate peroxidase 4                      | At4g09010              | DY010066       | Bra000663        | AGGTGACACTATAGAATACTGCTTTCATCTGCTCCGC         | GTACGACTCACTATAGGGATTGTTGTCACGCTTATGCTCA       |                                                                |
| tAPX             |                | Thylakoidal ascorbate peroxidase            | At1g77490              | EX054285       | Bra015668        | AGGTGACACTATAGAATAATTCACCCAAAAGAAAGAGC        | GTACGACTCACTATAGGGAAACAAGAGGACCAAAACGCTG       |                                                                |
| AO               |                | Ascorbate oxidase                           | At5g21105              | XM_009128252   | Bra020145        | AGGTGACACTATAGAATAGGGAAGAAAGAGCCATTGA         | GTACGACTCACTATAGGGATGTTGTAACGATGTGCTGC         |                                                                |
| AsA recycling    | MDHAR          | Monodehydroascobate reductase               | At3g27820              | EX100231       | Bra025303        | AGGTGACACTATAGAATAGGTGAGTACAGCATATAGTCCAG     | GTACGACTCACTATAGGGAGAGGCTTCCATCATCACC          |                                                                |
|                  | DHAR1          | Dehydroascobate reductase                   | At1g19570              | EX046186       | Bra008662        | AGGTGACACTATAGAATAACTAGTTCATCTGCTCCGC         | GTACGACTCACTATAGGGAAGCAATAATAGATTGTTGGTTAGAACA |                                                                |
|                  | DHAR2          | Dehydroascobate reductase                   | At1g75270              | EE521888       | Bra008188        | AGGTGACACTATAGAATACGTGCGAAATCTGAAGATCG        | GTACGACTCACTATAGGGACGGAGACGTTAGCGAGATGA        |                                                                |
|                  | GR             | Glutathione reductase                       | ---                    | AF008441       | Bra015006        | AGGTGACACTATAGAATAACACACCATCTTAGAGAGTTTGG     | GTACGACTCACTATAGGGATCATAGTGTCTCGGTTGTAGC       | Lee et al. (1998) Biochim Biophys Acta 1395:309-314            |
| Defense          | PR1            | ---                                         | At2g14610              | DN237938       | Bra013123        | AGGTGACACTATAGAATAACGTGCAATGAGAAATGCCT        | GTACGACTCACTATAGGGATTGCCCCGAGGATCATAGTT        |                                                                |
|                  | PDF1_2b        | ---                                         | At2g26020              | EX083692       | Bra015809        | AGGTGACACTATAGAATAATCTACCAAAAATCATGGGTGCT     | GTACGACTCACTATAGGGACTGCTACATGTCATGATGTCACCT    |                                                                |
|                  | RDR1           | ---                                         | At1g14790              | EX127661       | Bra026187        | AGGTGACACTATAGAATAAATCTATTGGAAAGGCGGTT        | GTACGACTCACTATAGGGATCACAATGATACCAAGCCGAG       |                                                                |
|                  | RDR6           | ---                                         | At3g49500              | EV015278       | Bra029957        | AGGTGACACTATAGAATACCTGAAGAAAGAGCTGAGG         | GTACGACTCACTATAGGGAAGCAAAGCTCAGCATCACC         |                                                                |
| JA responsive    | AF528182       | Glucosyltransferase-like protein            | ---                    | AF528182       | ---              | AGGTGACACTATAGAATACTGACGTCATCGAGCTTCT         | GTACGACTCACTATAGGGAATCACACAAGCAGCAGTTGG        | Park et al. (2003) Plant Cell Rep 21: 1027–1034                |
|                  | AF528183       | Putative metal-binding farnesylated protein | ---                    | AF528183       | ---              | AGGTGACACTATAGAATAGCAGAGCACTGGGAAAAAGA        | GTACGACTCACTATAGGGATCCGACTTCTCACAAAACC         | Park et al. (2003) Plant Cell Rep 21: 1027–1034                |

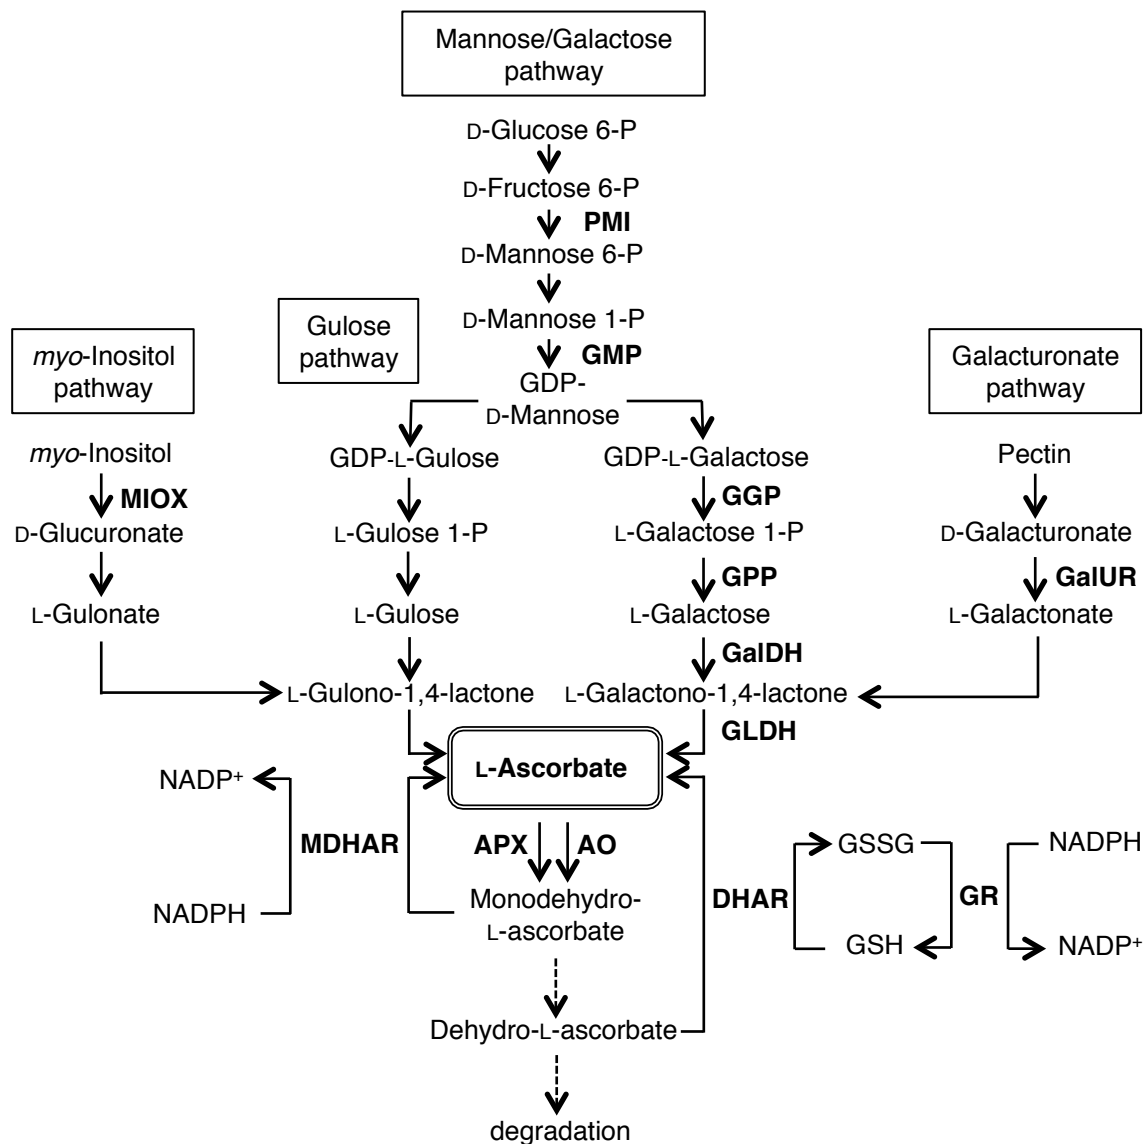

### Supplementary Figure S1

Proposed pathways for ascorbic acid biosynthesis, oxidation and recycling in plants. Arrows indicate a series of enzymatic reactions on each pathway, and the genes encoding each enzyme studied in this study are detailed on the pathways.

PMI, phosphomannose isomerase

GMP, GDP-D-mannose pyrophosphorylase

GGP, GDP-L-galactose phosphorylase

GPP, L-galactose-1-phosphate phosphatase

GalDH, L-galactose dehydrogenase

GLDH, L-galactono-1,4-lactone dehydrogenase

MIOX, myoinositol oxygenase

GalUR, D-galacturonate reductase

APX, ascorbate peroxidase

AO, ascorbate oxidase

MDHAR, monodehydroascorbate reductase

DHAR, dehydroascorbate reductase

GR, glutathione reductase

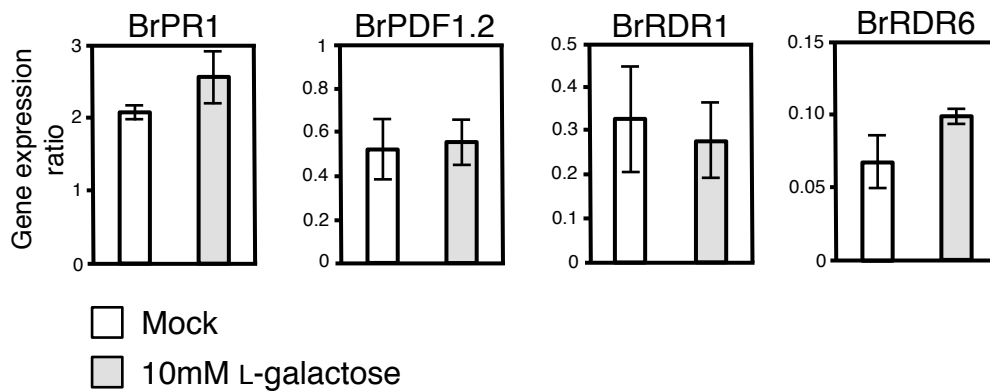

### Supplementary Figure S2

Expression level of defense genes in turnip (*Brassica rapa* subsp. *rapa*) cv. CR Mochibana after treatment with 10 mM L-galactose. Transcript levels were determined with quantitative RT-PCR 24 h after treatment. Error bars indicate standard error for biological triplicates. PR, pathogenesis-related protein; PDF, plant defensin; RDR, RNA-dependent RNA polymerase.

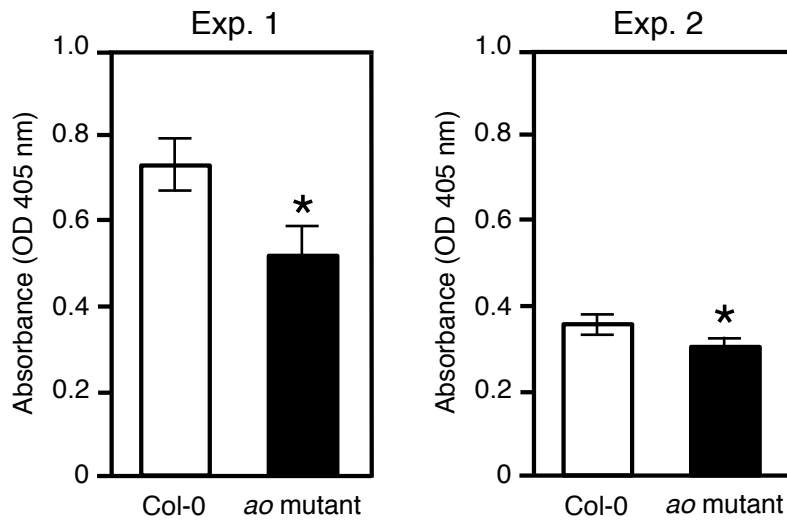

### Supplementary Figure S3

Viral accumulation of *Turnip mosaic virus* strain TuR1-YFP in non-inoculated upper leaves of an *Arabidopsis thaliana* ecotype Columbia (Col-0) and the *ao* mutant. Error bars indicate standard error for three to four biological replicates. Asterisks represent significant differences determined by Student's *t*-test (\* $P \leq 0.05$ ).

#### **Supplementary Figure S4**

Symptoms on inoculated and uninoculated upper leaves of the five Chinese cabbage (*Brassica rapa* subsp. *pekinensis*) and turnip (*Brassica rapa* subsp. *rapa*) cultivars with different alleles at the *Rnt1* locus. Second true leaves of each plant were inoculated with *Turnip mosaic virus* (TuMV) strain UK1. Chinese cabbage cvs. Aki-masari and Ku-kai 65 with resistance gene *Rnt1-1* did not develop lesions. In Chinese cabbage cv. Yu-shun carrying *rnt1-2*, necrotic lesions had developed by 5 days post inoculation (DPI) and expanded more by 8 DPI. At 14 DPI, the plants were systemically infected. Turnip cv. CR Mochibana carrying *rnt1-3* did not have any visible symptoms at 4 DPI, but chlorotic and necrotic spots had appeared on inoculated leaves by 8 DPI; by 14 DPI, mosaic symptoms were observed on uninoculated upper leaves. Turnip cv. Yuki-hime-kabu carrying *rnt1-3* had symptoms similar to those on CR mochi-bana, but yellowing of inoculated leaves developed earlier.

Inoculated leaves

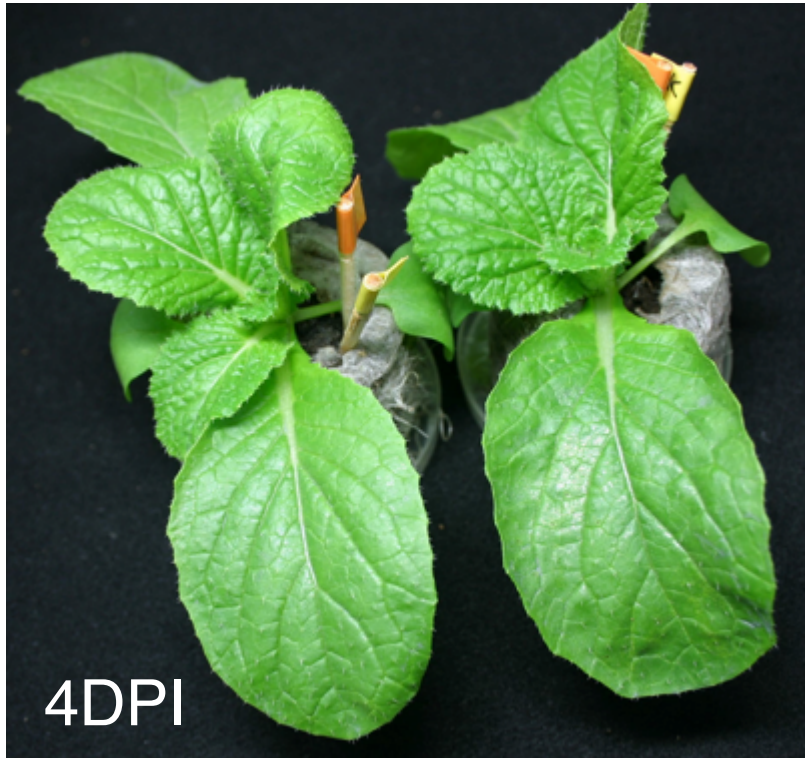

4DPI

Mock      TuMV-UK1

Aki-masari  
(*Rnt1-1/rnt1-3*)

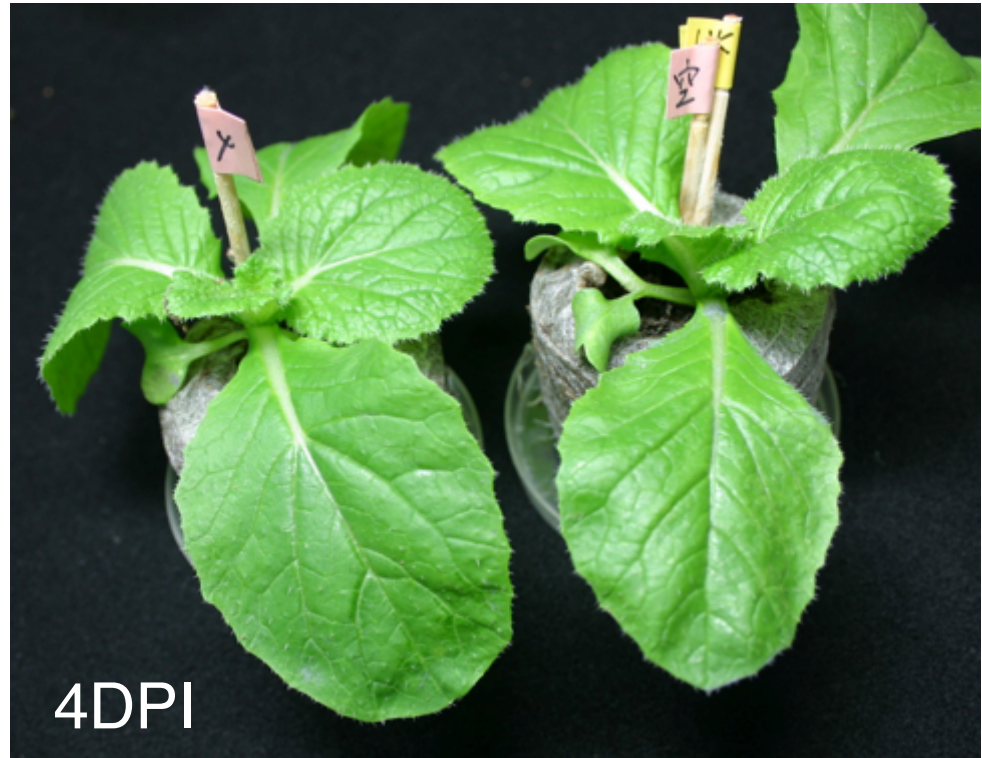

4DPI

Mock      TuMV-UK1

Ku-kai 65  
(*Rnt1-1/ -*)

Inoculated leaves

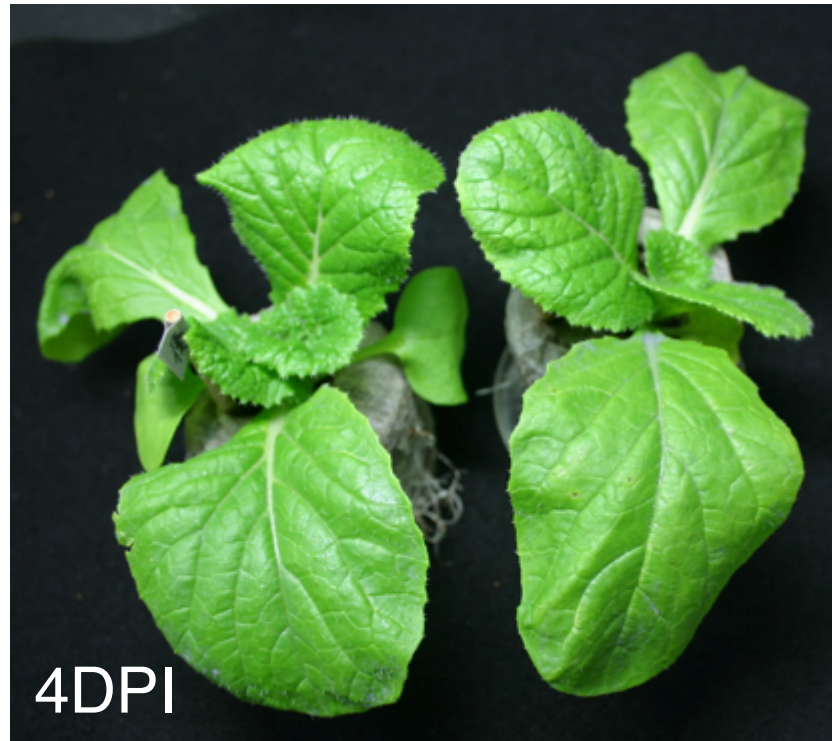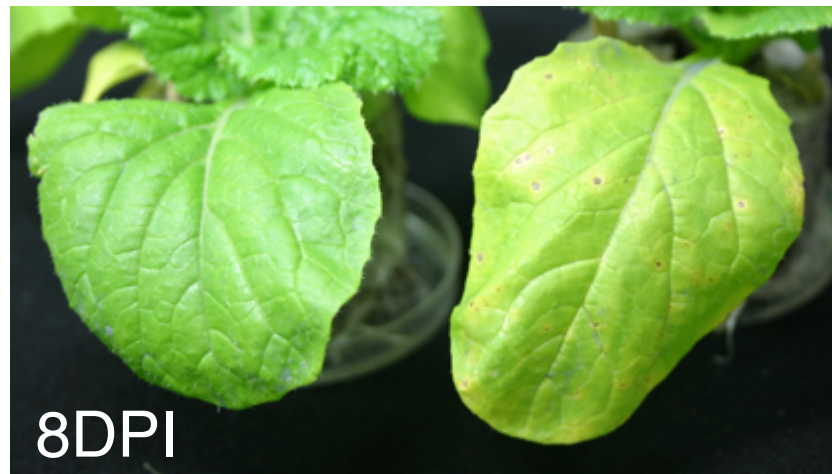

Mock

TuMV-UK1

Uninoculated upper leaves

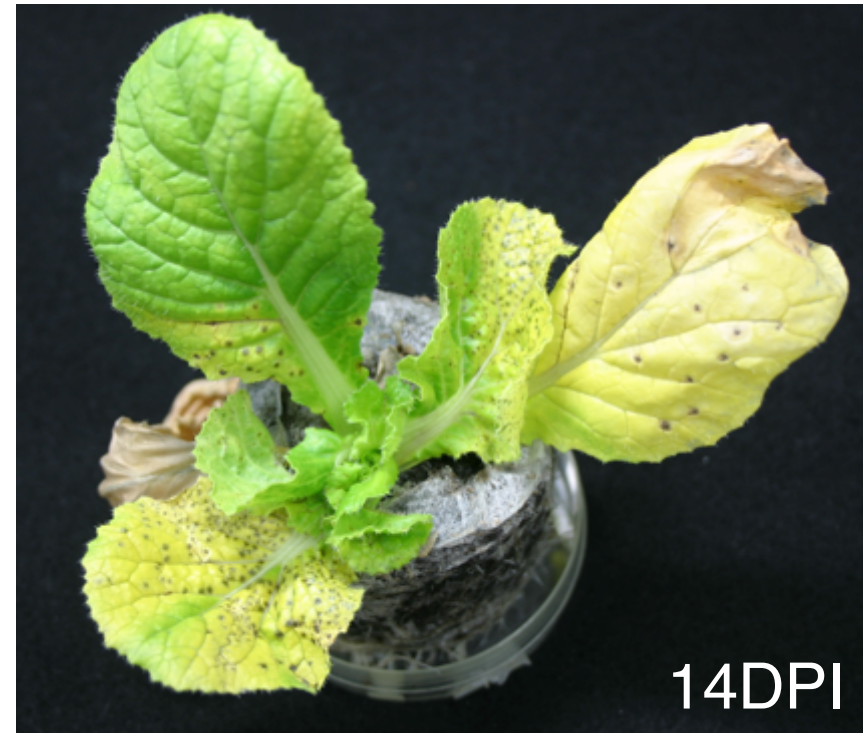

TuMV-UK1

Yu-shun  
(*rnt1-2/rnt1-2*)

Inoculated leaves

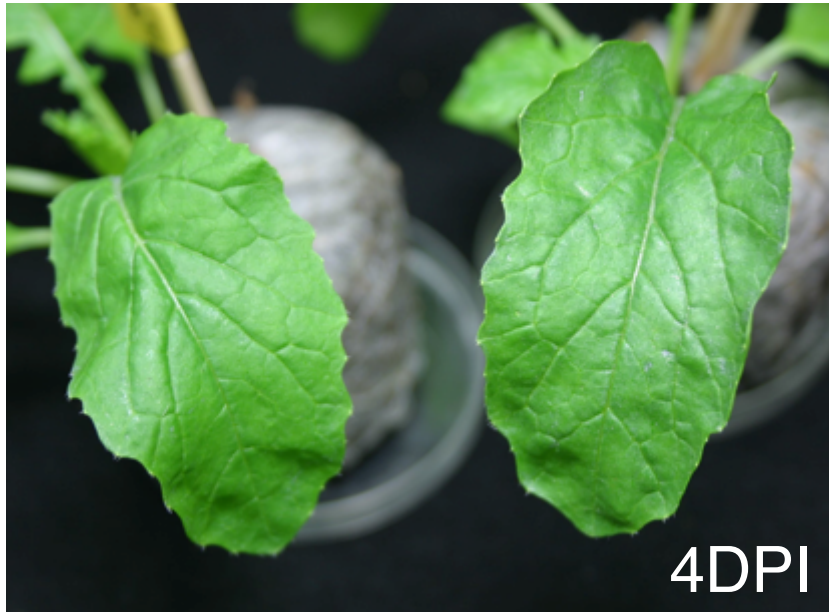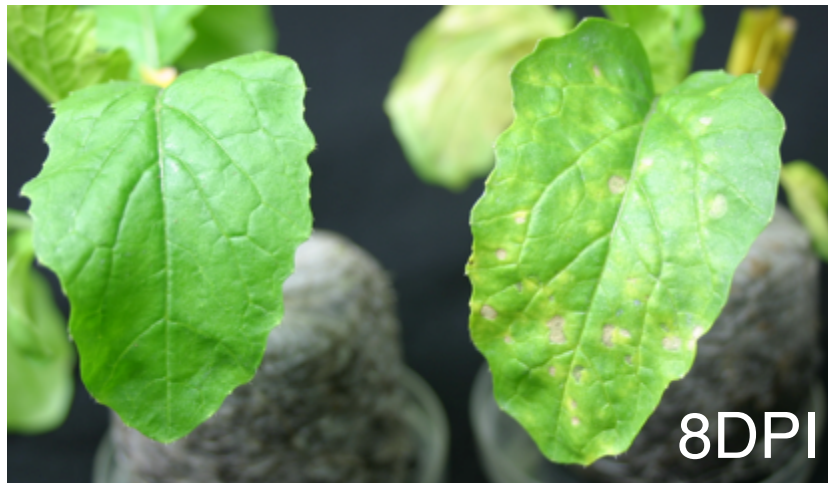

Mock

TuMV-UK1

Uninoculated upper leaves

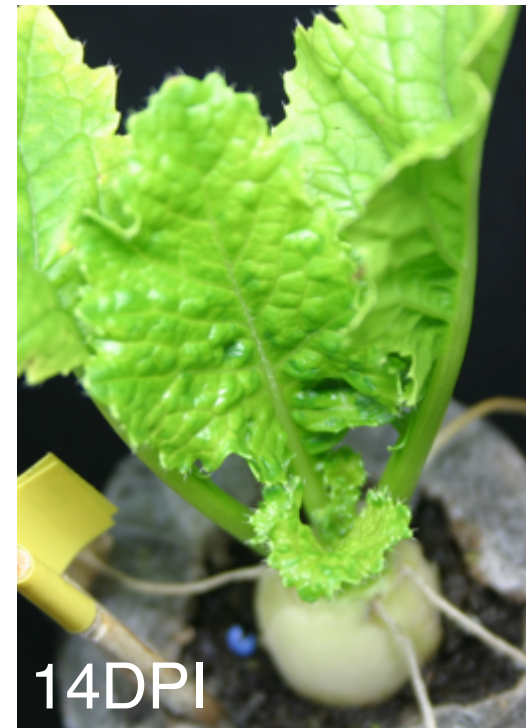

TuMV-UK1

CR Mochibana  
(*rnt1-3/rnt1-3*)



Inoculated leaves

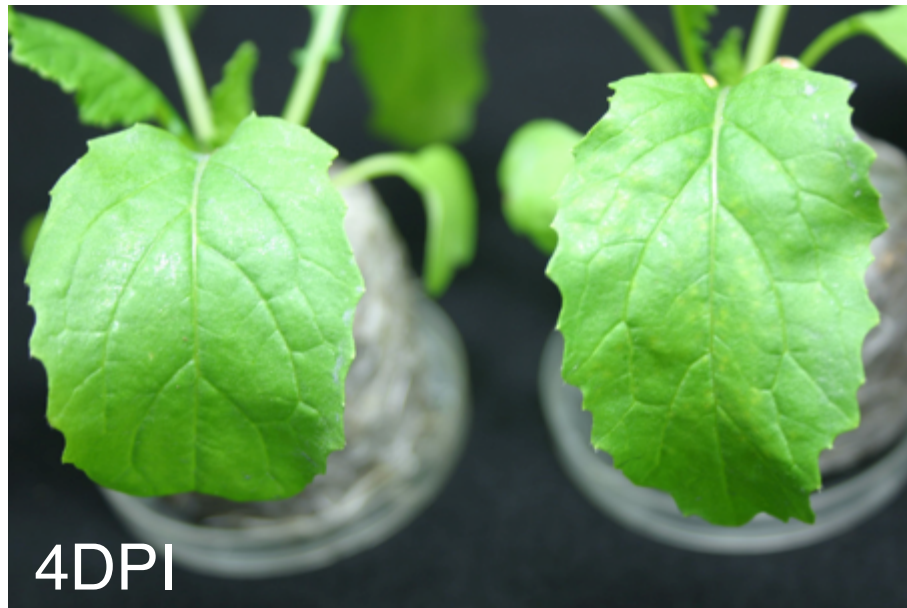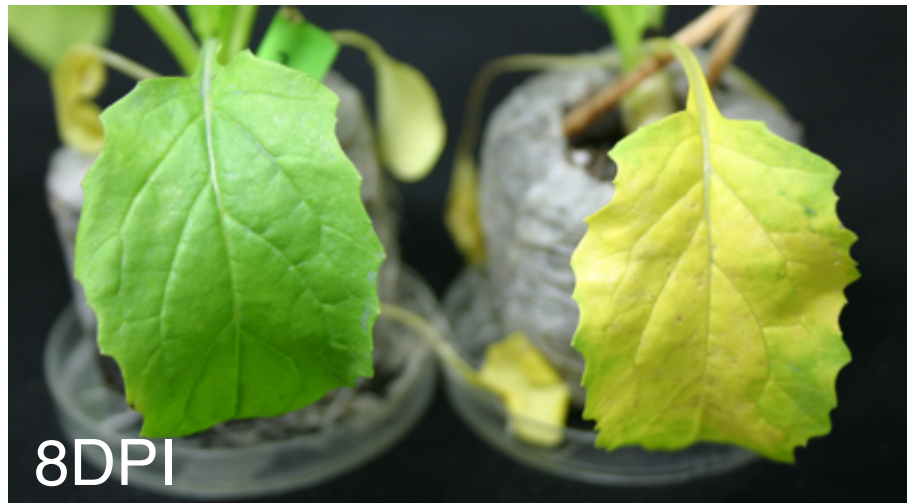

Mock

TuMV-UK1

Uninoculated upper leaves

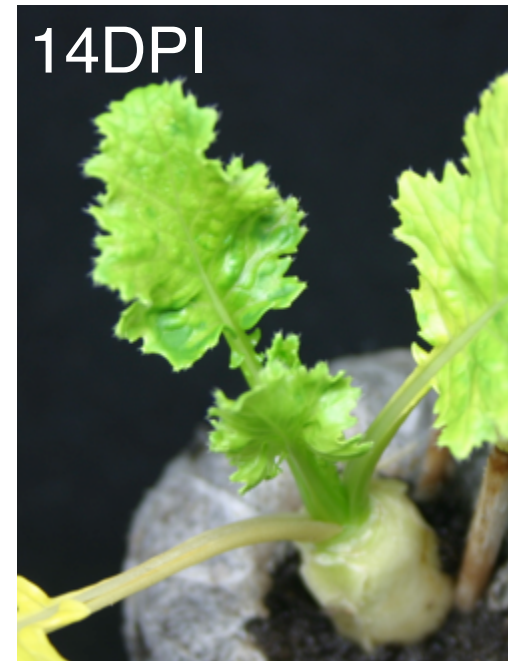

TuMV-UK1

Yukihime-kabu  
(*rnt1-3/rnt1-3*)

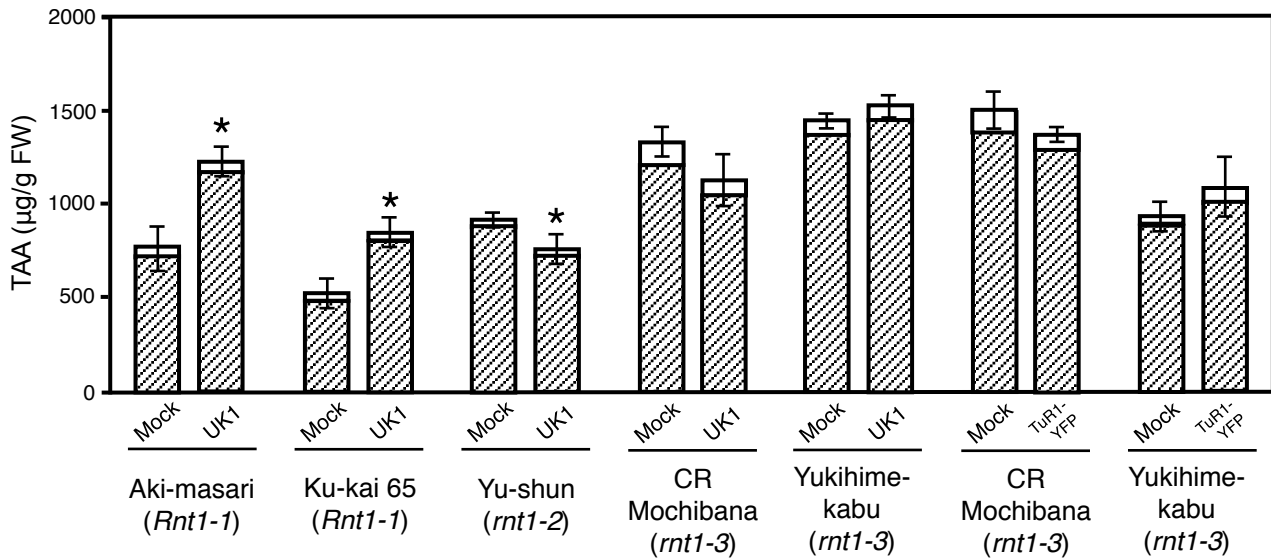

### Supplementary Figure S5

Mean TAA (ascorbic acid [AS] and dehydroascorbic acid [DHA]) content in the five Chinese cabbage (*Brassica rapa* subsp. *pekinensis*) and turnip (*Brassica rapa* subsp. *rapa*) cultivars carrying different alleles at the *Rnt1* locus after inoculation with *Turnip mosaic virus* strains UK1 or TuR1-YFP. TAA content in the inoculated second true leaves was quantified 3 or 4 days after inoculation. The genotype at the *Rnt1* locus in each cultivar is described in parentheses. Hatched boxes, AS; white boxes, DHA. Error bars indicate standard error for biological triplicates for TAA content. An asterisk represents a significant difference determined by Student's *t*-test ( $*P \leq 0.05$ ). FW, fresh mass.

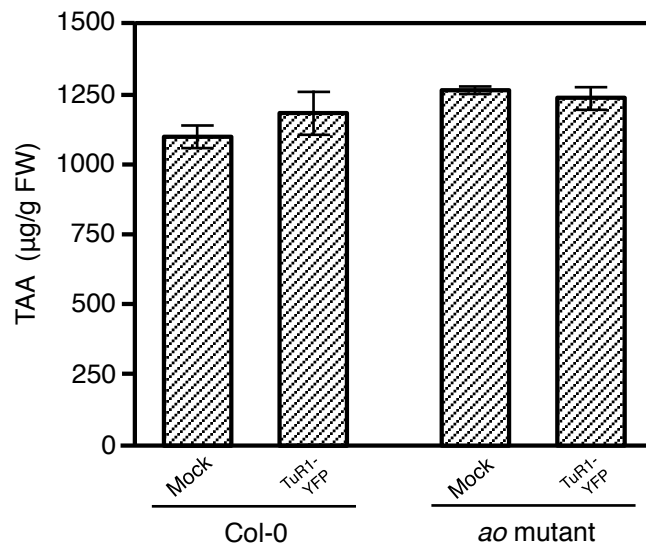

### Supplementary Figure S6

Mean TAA (ascorbic acid [AS] and dehydroascorbic acid [DHA]) content in the *Arabidopsis thaliana* ecotype Col-0 and the *ao* mutant after inoculation with *Turnip mosaic virus* strain TuR1-YFP. TAA content in non-inoculated upper leaves was quantified 10 days after inoculation. Error bars indicate standard error for biological triplicates for TAA content. FW, fresh mass.

### **Supplementary Figure S7**

Expression profiles determined with quantitative RT-PCR for genes for ascorbic acid (AS) synthesis, oxidation and recycling in turnip (*Brassica rapa* subsp. *rapa*) cvr. (A) Yukihiimekabu infected with *Turnip mosaic virus* (TuMV) strain UK1 at 4 days post inoculation (DPI) and (B) CR Mochibana infected with TuMV strain TuR1-YFP at 3 DPI. Asterisks represent significant differences determined by Student's t-test (\* $P \leq 0.05$ ; \*\*  $P \leq 0.01$ ). See Table S1 and Fig. S1 for full name of each gene and locations within the AS synthesis, oxidation and recycling pathways.

# A Yukihime-kabu

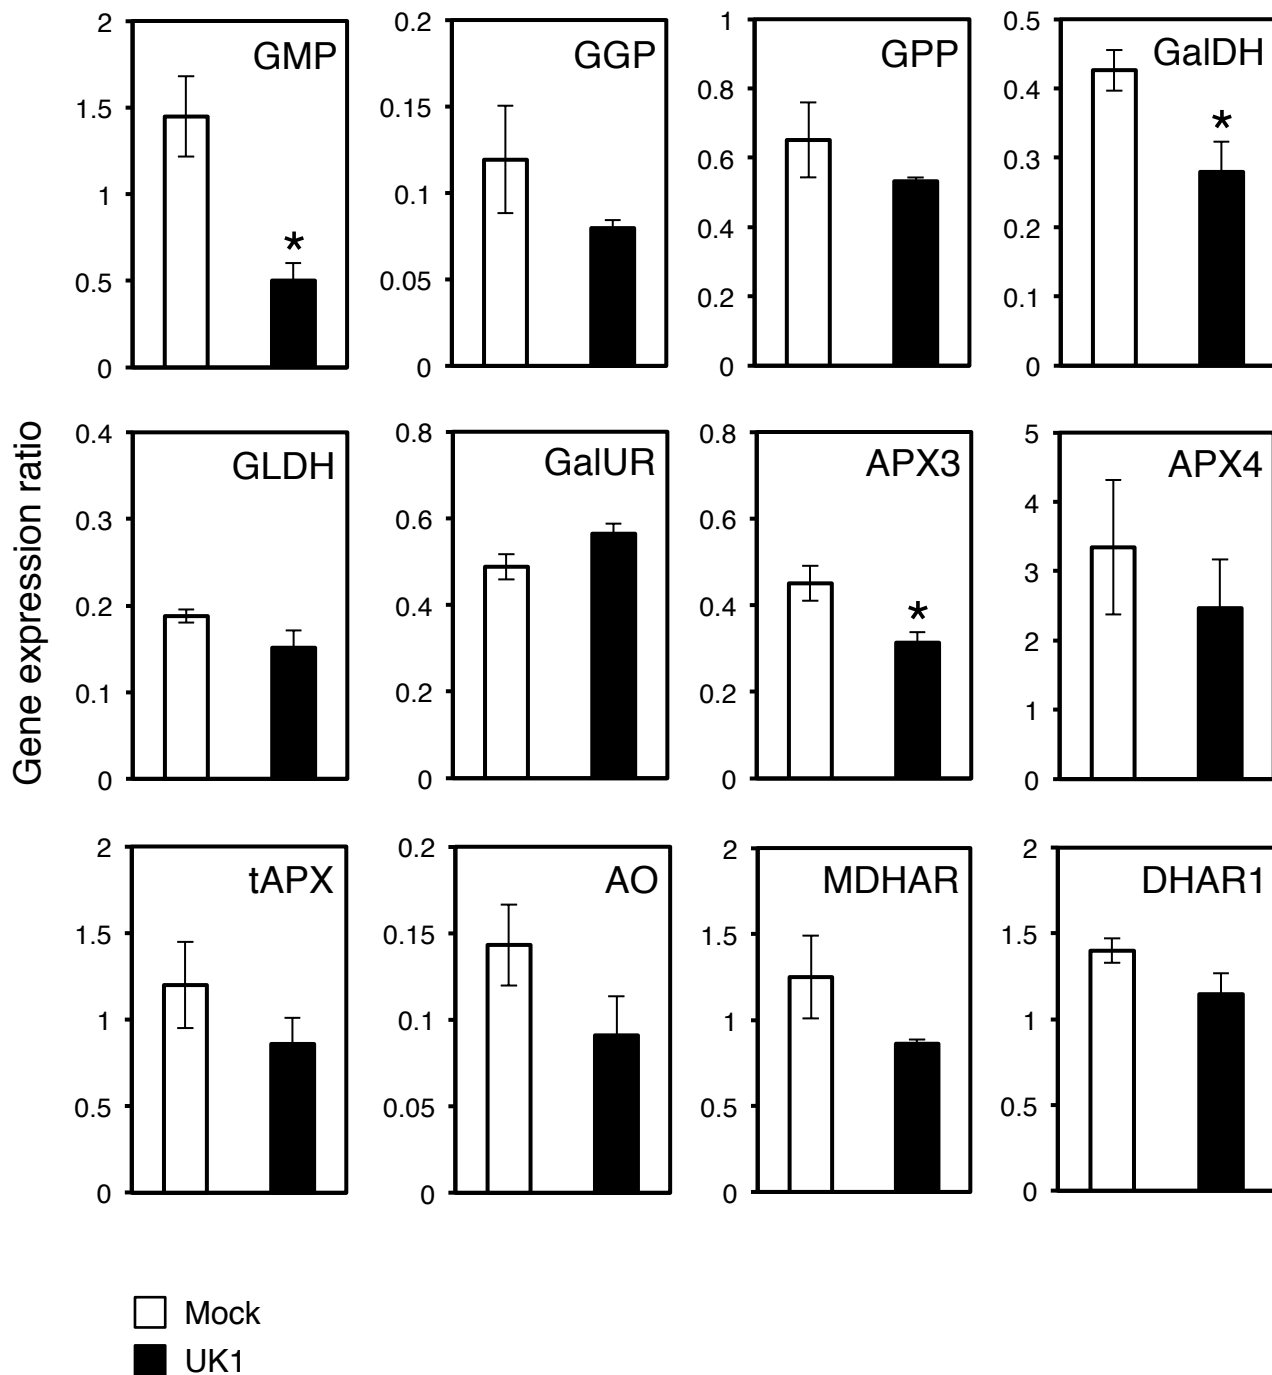

## B CR Mochibana

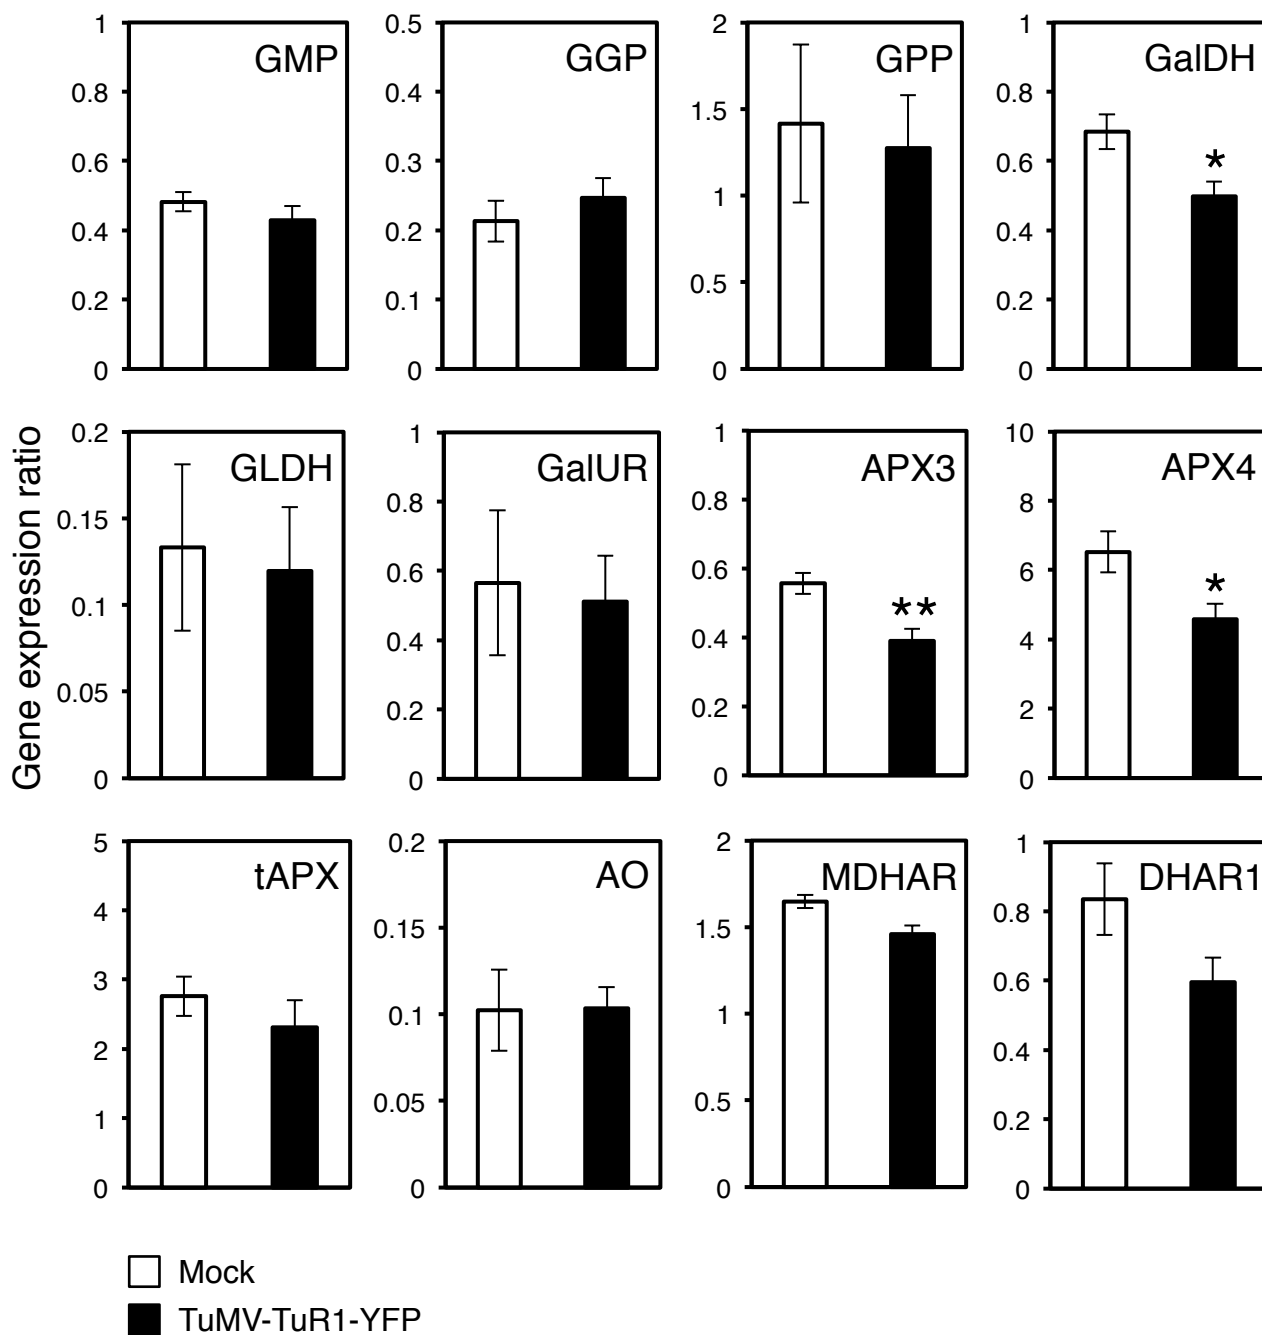

**Supplementary Figure S8**

Mean TAA [ascorbic acid (AS) and dehydroascorbic acid (DHA)] content in second true leaves of Chinese cabbage (*Brassica rapa* subsp. *pekinensis*) cv. Aki-masari at 24 h post treatment (HPT) with H<sub>2</sub>O<sub>2</sub>, salicylic acid (SA), methyl-jasmonate (MeJA) or abscisic acid (ABA) treatments. In the H<sub>2</sub>O<sub>2</sub> treatment, TAA levels were also quantified at 1, 6 and 12 HPT. Hatched boxes, AS; white boxes, DHA. Error bars indicate standard error for biological triplicates for TAA content. An asterisk represents a significant difference determined by the Student's *t*-test (\**P* ≤ 0.05); FW, fresh mass.

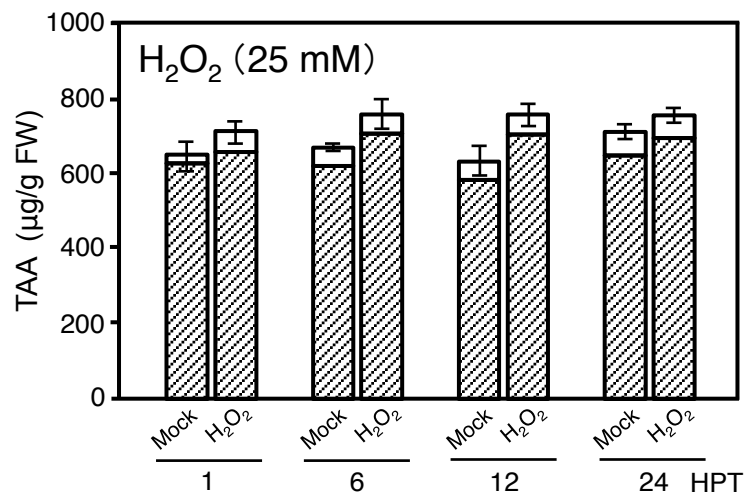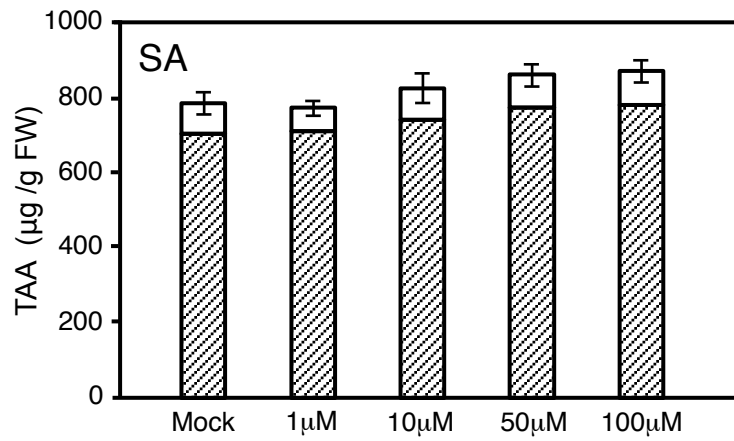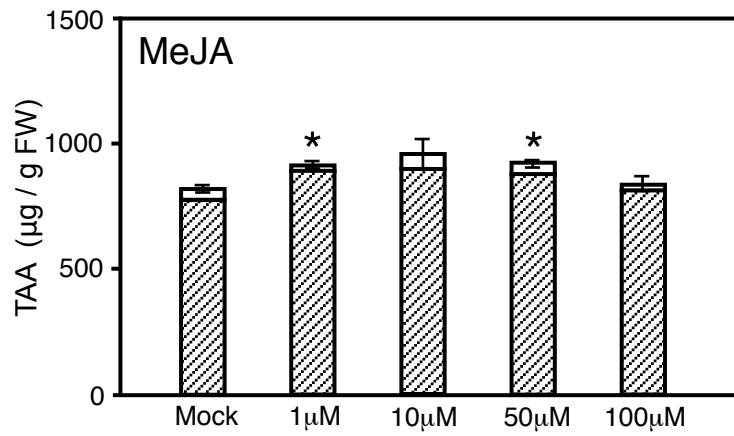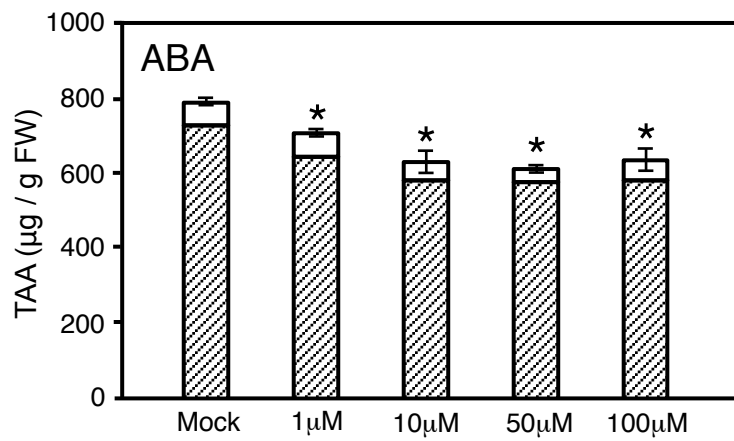



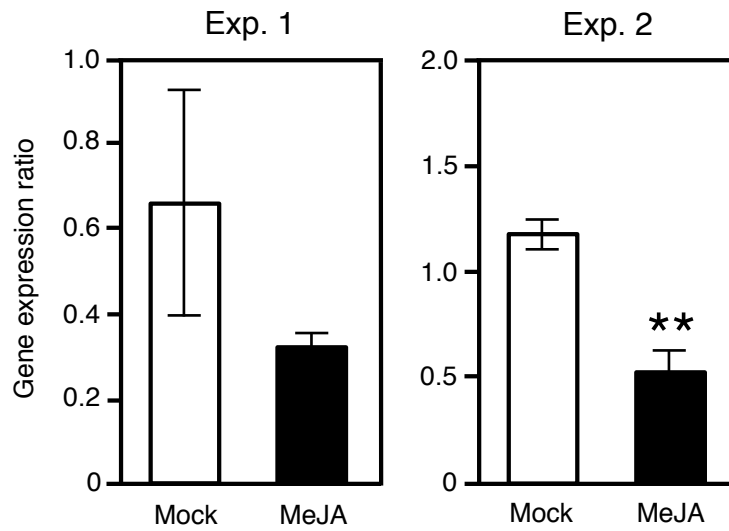

### Supplementary Figure S9

Expression change of *PDF1.2* in Chinese cabbage (*Brassica rapa* subsp. *pekinensis*) cv. Aki-masari after treatment with 50  $\mu$ M methyl-jasmonate (MeJA). Transcript levels were determined by quantitative RT-PCR 24 h after treatment. Error bars indicate standard error for biological triplicates. An asterisk represents a significant difference determined by Student's t-test (\*\* $P \leq 0.01$ ).

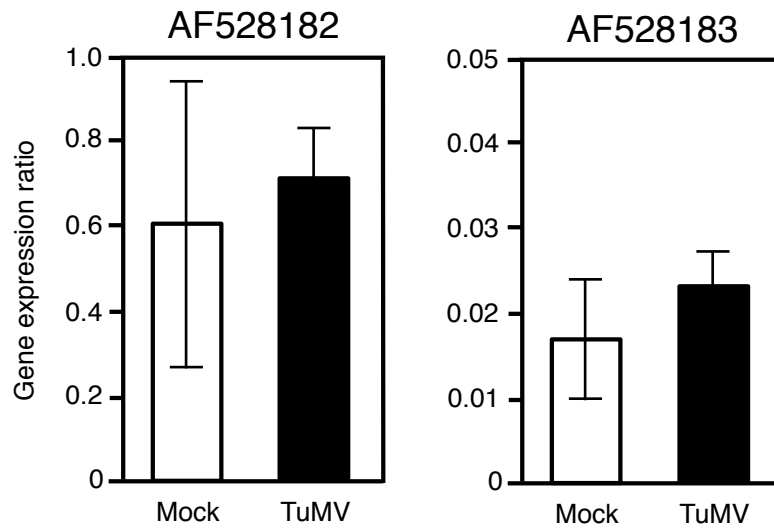

**Supplementary Figure S10**

Expression levels of the AF528182 and AF528183 genes in turnip (*Brassica rapa* subsp. *rapa*) cv. CR Mochibana by infection of *Turnip mosaic virus* (TuMV) strain TuR1-YFP. Transcript levels were determined by quantitative RT-PCR 3 days after inoculation. Error bars indicate standard error for biological triplicates.

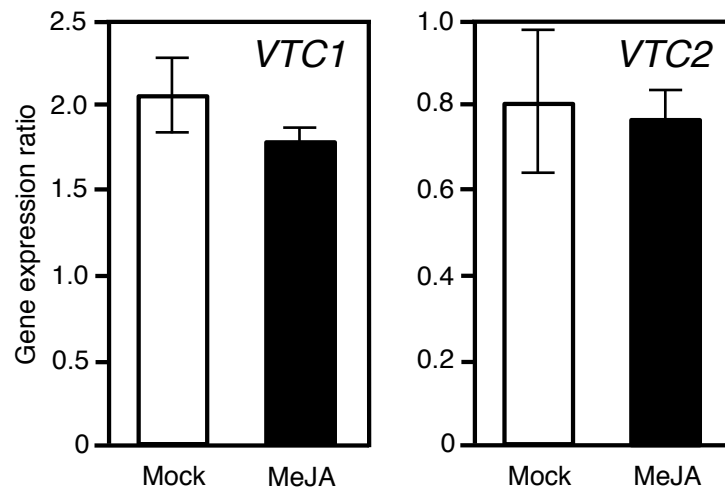

**Supplementary Figure S11**

Expression levels of the *VTC1* and *VTC2* genes in Chinese cabbage (*Brassica rapa* subsp. *pekinensis*) cv. Aki-masari after treatment with 50  $\mu$ M methyl-jasmonate (MeJA). Transcript levels were determined by quantitative RT-PCR 24 h after treatment. Error bars indicate standard error for biological triplicates.
